# Supplementary material for: Persistent Unresolved Inflammation in the Mecp2-308 Female Mutated Mouse Model of Rett Syndrome
Source: Mediators Inflamm. 2017 May 16;2017:9467819. doi: 10.1155/2017/9467819 (PMC5448068; doi:10.1155/2017/9467819)
Supplement: Supplementary file 2 [file 9467819.f2.xls]

## Sheet: Gel Analysis Table
Supplementary material
	Title:	Gel Analysis Table
Spots	Match ID	WT(1)	WT(2)	WT(3)	Mecp2-308(1)	Mecp2-308(2)	Mecp2-308(3)	P-value
	0	0.599934	0.559934	0.609934	0.5115	0.5215	0.5815	0.108089
	1	0.650283	0.670283	0.660283	0.672419	0.692419	0.662419	0.146095
	2	2.51897	2.53897	2.53897	2.40421	2.52421	2.50421	0.214932
	3	0.751972	0.761972	0.781972	0.782483	0.752483	0.762483	0.976352
	4	0.645729	0.695729	0.625729	0.715242	0.705242	0.705242	0.136826
	5	2.71209	2.73209	2.74209	2.70375	2.72375	2.69375	0.245563
1	6	4.81025	5.06381	4.91291	1.51031	1.73582	1.67318	6.26509e-05
	7	1.72497	1.75497	1.70497	1.7843	1.7543	1.8043	0.21165
2	8	6.57327	6.38481	6.31518	3.14827	3.22732	3.01382	0.000732424
	9	0.995361	0.945361	0.985361	0.9962	0.9762	1.0362	0.198866
	10	0.312867	0.342867	0.302867	0.38433	0.35433	0.37433	0.123638
	11	0.464103	0.384103	0.474103	0.386281	0.396281	0.396281	0.251954
	12	0.250461	0.230461	0.230461	0.257754	0.277754	0.247754	0.184382
	13	1.99637	2.11637	1.97637	2.1119	2.1219	2.1219	0.172037
	14	1.19177	1.16177	1.20177	1.22716	1.23716	1.21716	0.139889
	15	2.27689	2.25689	2.29689	2.28809	2.33809	2.33809	0.159215
	16	1.08811	1.03811	1.07811	1.04046	0.970463	0.920463	0.114922
	17	1.86284	1.85284	1.85284	1.82653	1.83653	1.84653	0.155804
	18	0.523723	0.553723	0.503723	0.57058	0.56058	0.56058	0.137268
	19	0.300773	0.340773	0.280773	0.265337	0.335337	0.245337	0.126003
	20	1.13071	1.16071	1.15071	1.18224	1.39224	1.37224	0.10239
	21	0.454515	0.424515	0.464515	0.405504	0.415504	0.385504	0.153052
	22	0.603781	0.563781	0.593781	0.610252	0.680252	0.690252	0.163143
	23	0.699035	0.709035	0.719035	0.713748	0.583748	0.633748	0.257386
	24	0.642319	0.622319	0.632319	0.652356	0.732356	0.692356	0.173071
	25	0.666782	0.716782	0.686782	0.72403	0.75403	0.70403	0.0841493
	26	1.31607	1.34607	1.30607	1.4284	1.3984	1.3084	0.222124
	27	1.90898	1.85898	1.91898	1.9962	2.0262	1.8762	0.368109
	28	0.454175	0.414175	0.444175	0.48974	0.51974	0.46974	0.157926
	29	0.550096	0.520096	0.540096	0.436405	0.506405	0.416405	0.140028
	30	2.19963	2.21963	2.17963	2.26353	2.25353	2.28353	0.0801635
	31	0.607138	0.817138	0.587138	0.785124	0.805124	0.775124	0.21145
	32	0.612907	0.532907	0.602907	0.635302	0.605302	0.645302	0.0878569
	33	1.07359	0.96359	1.05359	0.982608	0.992608	0.972608	0.340875
	34	1.23847	1.25847	1.26847	1.31263	1.29263	1.26263	0.277231
	35	1.383	1.363	1.373	1.25264	1.35264	1.23264	0.154069
	36	2.4185	2.4485	2.3985	2.36579	2.35579	2.38579	0.14995
	37	1.25796	1.36796	1.27796	1.39799	1.37799	1.38799	0.158134
	38	1.9179	1.9579	1.9679	1.93496	1.92496	1.94496	0.486044
	39	1.13394	1.16394	1.11394	1.27043	1.15043	1.25043	0.225806
	40	0.732345	0.682345	0.752345	0.641573	0.721573	0.651573	0.377134
	41	1.30321	1.42321	1.32321	1.45058	1.38058	1.43058	0.346008
	42	0.706867	0.756867	0.696867	0.719235	0.719235	0.699235	0.666885
	43	0.680458	0.710458	0.660458	0.78745	0.77745	0.66745	0.173551
	44	0.428541	0.43725	0.448541	0.475412	0.445412	0.495412	0.119065
	45	0.362921	0.372921	0.342921	0.413802	0.373802	0.333802	0.523785
	46	0.466076	0.486076	0.476076	0.423641	0.513641	0.473641	0.802784
	47	0.711551	0.761551	0.691551	0.789565	0.779565	0.809565	0.133469
	48	1.33579	1.30579	1.35579	1.62931	1.34932	1.61931	0.126279
	49	0.907747	1.02775	0.927747	1.04732	1.01732	1.02732	0.231223
	50	0.800667	0.840667	0.780667	0.788291	0.818291	0.808291	0.890672
	51	1.90118	1.94118	1.88118	1.82955	1.92955	1.80955	0.12298
	52	2.48293	2.46293	2.50293	2.4749	2.4649	2.4849	0.29881
11	53	0.70974	0.79381	0.62528	1.42471	1.52836	1.36071	8.40658e-05
	54	2.24169	2.22169	2.22169	2.30297	2.28297	2.20297	0.323812
10	55	1.58482	1.45371	1.51428	3.19172	3.07036	3.03143	0.000401338
	56	2.23945	2.18945	2.25945	2.12931	2.14931	2.10931	0.0894426
	57	2.25147	2.21147	2.26147	2.22585	2.25585	2.27585	0.640368
	58	1.37621	1.39621	1.36621	1.38335	1.35335	1.41335	0.897317
	59	1.26761	1.30761	1.27761	1.22327	1.20327	1.24327	0.107976
	60	1.40518	1.43518	1.42518	1.3513	1.4213	1.3413	0.130209
	61	0.373832	0.383832	0.363832	0.34505	0.35505	0.35505	0.080105
	62	0.339179	0.289179	0.329179	0.301231	0.291231	0.291231	0.206159
	63	0.701251	0.741251	0.721251	0.714283	0.784283	0.734283	0.147823
	64	1.23519	1.20519	1.25519	1.17356	1.20356	1.16356	0.190293
	65	1.98999	1.96999	1.97999	2.02054	1.97054	2.03054	0.201912
	66	2.10567	2.17567	2.08567	2.20213	2.18213	2.21213	0.168034
	67	1.90048	1.94048	1.91048	1.87688	1.84688	1.89688	0.225325
	68	1.85111	1.76111	1.83111	1.77871	1.80871	1.76871	0.528503
	69	2.27992	2.24992	2.29992	2.41967	2.22967	2.39967	0.267825
	70	1.15089	1.06089	1.14089	1.06396	1.04396	1.07396	0.111742
	71	1.0859	1.0959	1.1059	1.06215	1.08215	1.04215	0.157757
	72	1.48353	1.35353	1.50353	1.33703	1.30703	1.32703	0.0885021
	73	2.09039	2.16039	2.18039	2.12385	2.13385	2.14385	0.695854
	74	3.27149	3.19149	3.23149	3.23879	3.21879	3.22879	0.890437
	75	1.03948	1.08948	1.02948	1.1119	1.0919	1.1019	0.170061
4	76	1.65231	1.54194	1.46057	3.22763	3.18906	3.31582	0.00245054
	77	1.74128	1.88129	1.66128	1.79275	1.82275	1.80275	0.519562
	78	5.98425	5.91425	5.96425	5.77177	5.89177	5.79177	0.143336
	79	1.92202	1.97202	1.94202	1.88469	1.87469	1.90469	0.103212
	80	1.04851	1.01851	1.02851	1.09129	1.01129	1.07129	0.257671
	81	1.05767	1.00767	1.06767	1.03987	1.04987	1.02987	0.869636
	82	1.53552	1.54552	1.51552	1.67515	1.55515	1.68515	0.162818
	83	1.05839	1.01839	1.03839	1.08451	1.06451	1.01451	0.519719
	84	1.55732	1.57732	1.54732	1.44189	1.55188	1.46189	0.104146
	85	1.36098	1.41098	1.38098	1.2365	1.4265	1.2165	0.236813
	86	0.578486	0.538486	0.588486	0.551213	0.571213	0.571213	0.851561
	87	0.588559	0.458559	0.568559	0.423496	0.413496	0.443496	0.0868909
	88	2.0117	2.0317	2.0317	2.21406	2.07406	2.20406	0.10539
	89	1.30452	1.28452	1.29452	1.30258	1.29258	1.29258	0.716551
	90	0.729161	0.819161	0.709161	0.832709	0.842709	0.852709	0.124895
	91	2.08622	2.09622	2.07622	2.17419	2.09419	2.16419	0.193032
	92	1.49041	1.53041	1.50041	1.4411	1.4211	1.4611	0.0944646
	93	0.830196	0.840196	0.850196	0.835073	0.815073	0.815073	0.264405
3	94	2.77261	2.68528	2.82073	1.28246	1.37391	1.20382	0.00360162
	95	0.888209	1.07821	0.878209	0.985416	1.01542	0.975416	0.49719
	96	2.94119	2.73119	2.93119	2.79022	2.78022	2.77022	0.328563
	97	1.39912	1.35912	1.32912	1.30842	1.31842	1.31842	0.179481
	98	0.386802	0.416802	0.396802	0.414377	0.394377	0.394377	0.955838
	99	0.979401	1.0594	0.989401	1.03321	1.06321	1.04321	0.155655
	100	2.02526	2.07526	2.01526	2.05015	2.07015	2.03015	0.320328
	101	0.948807	0.998807	0.928807	0.984262	0.914262	0.894262	0.507132
7	102	6.85382	6.99827	6.76372	4.78625	4.8955	4.7472	0.000147374
	103	1.42762	1.41762	1.41762	1.37987	1.40987	1.36987	0.122965
	104	2.48815	2.43815	2.46815	2.55683	2.43683	2.54683	0.192733
	105	2.12342	2.15342	2.11342	2.19633	2.17633	2.21633	0.10491
8	106	6.64033	6.51482	6.44517	1.70921	1.68653	1.76192	0.000222961
	107	3.56324	3.61324	3.67324	3.59699	3.61699	3.61699	0.835244
	108	3.20052	3.34052	3.18052	3.33219	3.36219	3.35219	0.137001
	109	1.42309	1.39309	1.44309	1.43294	1.41294	1.41294	0.993149
	110	1.03941	1.02941	1.02941	0.989632	1.04963	1.00963	0.502441
	111	2.28091	2.31091	2.26091	2.27972	2.26972	2.29972	0.963588
	112	0.892734	0.942734	0.912734	0.744973	0.954973	0.824973	0.251786
	113	1.33555	1.29555	1.32555	1.31237	1.34237	1.28237	0.833555
	114	2.17346	2.19346	2.15346	2.29263	2.12263	2.17263	0.721493
	115	5.92323	5.87323	5.91323	5.89631	5.86631	5.91631	0.364953
	116	2.54916	2.59916	2.55916	2.51701	2.55701	2.64701	0.923756
	117	1.11056	1.09056	1.12056	1.1159	1.0959	1.1059	0.86035
	118	1.25017	1.19017	1.24017	1.23174	1.26174	1.21174	0.81975
	119	1.40693	1.38693	1.38693	1.39268	1.42268	1.40268	0.482817
	120	1.86976	1.89976	1.87976	1.85299	1.87299	1.80299	0.163303
	121	1.7712	1.7912	1.7512	1.63839	1.71839	1.72839	0.138945
	122	0.560714	0.610714	0.580714	0.599741	0.629741	0.519741	0.977485
	123	0.881605	0.921605	0.861605	0.788338	0.898338	0.818338	0.124774
6	124	0.910271	0.985383	0.810732	1.42428	1.61273	1.56453	0.0118066
	125	1.68991	1.65991	1.70991	1.61519	1.64519	1.73519	0.538364
	126	1.40032	1.38032	1.41032	1.40501	1.37501	1.41501	0.723433
	127	1.31469	1.35469	1.33469	1.35692	1.36692	1.34692	0.156288
	128	1.75378	1.70378	1.73378	1.70511	1.69511	1.69511	0.116815
	129	1.59054	1.61054	1.58054	1.61722	1.55722	1.62722	0.847204
	130	1.21164	1.18164	1.42164	1.13764	1.10764	1.12764	0.182264
	131	2.20151	2.24151	2.21151	2.29618	2.26618	2.19618	0.393588
	132	1.27434	1.24434	1.28434	1.1708	1.1608	1.29079	0.217046
	133	1.95672	1.91672	1.94672	1.86338	1.94338	1.88338	0.352366
	134	2.63181	2.61181	2.61181	2.67954	2.69954	2.60954	0.230252
	135	1.30423	1.25423	1.31423	1.3287	1.2987	1.2787	0.68867
	136	1.85633	1.89633	1.83633	1.89693	1.86693	1.87693	0.536523
	137	2.47756	2.48756	2.42756	2.45779	2.44779	2.46779	0.813956
	138	1.62102	1.57102	1.60102	1.59758	1.56758	1.61758	0.793811
	139	1.07686	1.11686	1.08686	1.07672	1.00672	0.97672	0.182977
	140	1.42923	1.38923	1.40923	1.39157	1.40157	1.41157	0.665877
	141	1.0847	1.1347	1.0747	1.05948	1.02948	1.04948	0.19109
	142	2.42173	2.40173	2.36173	2.38107	2.41107	2.39107	0.977688
	143	1.39582	1.44582	1.41582	1.41192	1.38192	1.40192	0.471061
	144	0.571359	0.561359	0.581359	0.592964	0.602964	0.582964	0.202242
	145	2.30154	2.26154	2.29154	2.40373	2.30373	2.32373	0.114678
	146	1.03623	1.00623	1.04623	1.07072	1.06072	1.01072	0.58076
	147	1.56068	1.55068	1.57068	1.51922	1.56922	1.49922	0.356447
	148	0.521631	0.551631	0.501631	0.640296	0.540296	0.650296	0.224377
	149	0.728781	0.758781	0.738781	0.71882	0.75882	0.69882	0.300697
	150	1.39642	1.37642	1.41642	1.34871	1.28871	1.38871	0.0910758
	151	1.11407	1.15407	1.10407	1.21252	1.19251	1.23252	0.0790251
	152	1.53849	1.55849	1.54849	1.45779	1.58779	1.44779	0.336406
	153	2.21385	2.20385	2.19385	2.32117	2.22117	2.33117	0.136452
	154	2.39013	2.40013	2.41013	2.42774	2.41774	2.41774	0.140814
	155	0.997764	0.987764	0.977764	0.885856	0.995856	0.875856	0.216381
	156	1.68126	1.67126	1.66126	1.64123	1.67123	1.63123	0.191326
	157	2.17866	2.12866	2.19866	2.00959	2.17959	1.99959	0.311749
	158	1.67309	1.70309	1.66309	1.56517	1.64517	1.71517	0.506516
	159	1.42512	1.47512	1.40512	1.37823	1.36823	1.35823	0.0789528
	160	1.48354	1.46354	1.46354	1.45596	1.48596	1.43596	0.580124
	161	0.857539	0.887539	0.847539	0.894033	0.814033	0.874033	0.929583
	162	1.16191	1.15191	1.18191	1.26106	1.18732	1.24106	0.0738858
	163	0.941345	0.981345	0.951345	1.02507	0.97507	0.99507	0.260955
	164	6.65555	6.64555	6.64555	6.67838	6.62838	6.68838	0.456207
	165	0.724497	0.754497	0.714497	0.684438	0.664438	0.764438	0.58107
	166	1.30452	1.23452	1.32452	1.22664	1.20664	1.21664	0.0926749
	167	7.07757	7.10757	7.06757	7.05009	7.08009	7.07009	0.222574
	168	1.24839	1.28839	1.25839	1.2348	1.2248	1.2948	0.684155
	169	1.42754	1.38754	1.43754	1.44317	1.47317	1.42317	0.431373
	170	2.292	2.242	2.282	2.26464	2.29464	2.25464	0.981565
	171	0.814506	0.854506	0.804506	0.886397	0.876397	0.906397	0.107696
	172	0.760103	0.820103	0.780103	0.781164	0.801164	0.771164	0.867487
	173	1.26471	1.24471	1.28471	1.31023	1.28023	1.29023	0.138389
12	174	1.09373	1.18461	1.04229	1.65231	1.53039	1.58125	0.0193425
	175	1.66894	1.64894	1.65894	1.69054	1.70054	1.63054	0.587797
	176	1.95985	1.90985	1.96985	1.97996	1.99996	1.98996	0.203653
	177	2.2592	2.2892	2.2392	2.12175	2.25175	2.19175	0.145058
	178	0.775596	0.785596	0.765596	0.739146	0.769146	0.759146	0.154076
	179	0.983043	1.01304	0.993043	0.939762	1.03976	0.919762	0.41851
	180	1.0838	1.0538	1.1038	1.06688	1.05688	1.04688	0.312944
	181	1.17344	1.14344	1.16344	1.27844	1.19844	1.11844	0.476335
	182	0.991185	1.03119	0.981185	0.890031	1.02003	0.910031	0.146996
	183	2.61539	2.64539	2.63539	2.74128	2.64128	2.69128	0.255604
	184	1.11375	1.23375	1.29375	1.14428	1.12428	1.13428	0.297087
	185	2.12115	2.07116	2.10115	2.08921	2.06921	2.07921	0.169224
	186	7.66122	7.68122	7.67122	7.74033	7.64033	7.76033	0.416463
	187	2.72317	2.76317	2.71317	2.80547	2.76547	2.73547	0.27644
	188	1.40513	1.35513	1.42513	1.55313	1.36313	1.39313	0.527858
	189	1.52134	1.53134	1.51134	1.53819	1.57819	1.58819	0.113814
	190	2.64782	2.59782	2.66782	2.69188	2.66188	2.64188	0.421118
	191	1.46379	1.50379	1.48379	1.50083	1.49083	1.52083	0.346082
	192	3.0408	3.1608	3.2008	3.05033	3.08033	3.04033	0.256798
	193	0.515688	0.505688	0.495688	0.598868	0.618868	0.498868	0.180008
	194	0.900915	1.05092	0.980915	1.06748	1.03748	1.04748	0.294841
	195	2.22976	2.25976	2.23976	2.29565	2.22565	2.30565	0.431723
	196	1.91775	1.95775	1.93775	1.86554	1.93554	1.84554	0.111424
	197	0.951393	0.981393	0.931393	0.987896	0.997896	0.997896	0.111264
	198	1.42855	1.41855	1.44855	1.40392	1.42392	1.38392	0.301826
	199	1.30615	1.27615	1.32615	1.32016	1.34016	1.33016	0.278473
	200	2.52866	2.53866	2.51866	2.60631	2.52631	2.59631	0.253142
	201	2.06189	2.09189	2.04189	2.15994	2.06994	2.17994	0.275876
	202	1.30152	1.26152	1.32152	1.32863	1.31863	1.30863	0.361698
	203	1.4439	1.4039	1.4539	1.49897	1.47897	1.42897	0.369776
	204	0.705306	0.685306	0.685306	0.696213	0.716213	0.676213	0.780601
5	205	1.10252	1.04371	0.95191	1.48135	1.58231	1.42142	0.00986525
	206	1.92745	1.96745	1.94745	1.91015	1.90015	1.93015	0.178429
	207	1.84537	1.87537	1.86537	1.79565	1.86565	1.81565	0.112136
	208	1.80153	1.79153	1.79153	1.8414	1.7714	1.8314	0.42516
	209	1.91237	1.95237	1.89237	1.87485	1.89485	1.88485	0.142906
	210	1.84886	1.89886	1.91886	1.83208	1.85208	1.81208	0.164997
	211	1.66219	1.63219	1.68219	1.6466	1.6566	1.7066	0.493496
	212	1.73127	1.71127	1.74127	1.83665	1.77665	1.71665	0.332666
	213	1.75147	1.84147	1.73147	1.81126	1.83126	1.83126	0.261489
14	214	2.67341	2.83412	2.63272	0.93047	0.88271	0.99483	0.00267608
	215	2.02779	2.06779	2.04779	2.14173	2.05173	2.13173	0.262977
	216	2.25595	2.23595	2.23595	2.29793	2.24793	2.27793	0.0854344
	217	2.40004	2.36004	2.42004	2.38329	2.39329	2.39329	0.870951
	218	1.48467	1.51467	1.49467	1.51775	1.48775	1.52775	0.580235
	219	1.10759	1.07759	1.12759	1.20025	1.07025	1.11025	0.584896
	220	1.15948	1.12948	1.14948	1.26212	1.13212	1.24212	0.173683
	221	2.65563	2.63563	2.63563	2.64184	2.62184	2.65184	0.741332
	222	1.99011	1.98011	2.01011	1.91678	1.94678	2.03678	0.455717
	223	1.92408	1.96408	1.94408	2.03942	1.97942	2.04942	0.131837
	224	1.54514	1.56514	1.55514	1.57398	1.59398	1.55398	0.200263
	225	1.40606	1.37606	1.39606	1.42524	1.43524	1.43524	0.0769678
	226	3.75603	3.77603	3.73603	3.7389	3.7289	3.7289	0.186252
	227	2.78005	2.75005	2.79005	2.82641	2.81641	2.80641	0.0976178
	228	2.55846	2.52846	2.56846	2.59319	2.61319	2.57319	0.218058
	229	1.52984	1.49984	1.53984	1.57236	1.46236	1.56236	0.739323
	230	2.35797	2.36797	2.34797	2.38399	2.31399	2.39399	0.861997
	231	2.09805	2.07805	2.08805	2.18488	2.05488	2.19488	0.294923
	232	4.56936	4.53936	4.58936	4.42258	4.54258	4.43258	0.192693
	233	1.21334	1.23334	1.22334	1.33	1.24	1.35	0.162494
	234	2.50421	2.54421	2.49421	2.44857	2.56857	2.42857	0.374299
	235	1.65714	1.63714	1.67714	1.55945	1.64945	1.53945	0.239157
	236	2.93987	2.89987	2.91987	2.90497	2.88497	2.91497	0.174624
	237	0.968285	0.918285	0.988285	0.96873	0.97873	0.94873	0.829485
	238	2.76571	2.81571	2.75571	2.75652	2.77652	2.76652	0.479694
	239	1.25233	1.22233	1.27233	1.16903	1.27903	1.15903	0.467343
	240	1.01255	1.06255	0.992548	0.98843	0.96843	0.99843	0.333576
	241	0.726438	0.746438	0.736438	0.728033	0.758033	0.708033	0.714067
	242	1.33989	1.37989	1.31989	1.40924	1.37924	1.39924	0.18892
	243	1.23846	1.28846	1.21846	1.29399	1.22399	1.28399	0.695781
13	244	1.05372	1.11824	1.02172	1.57466	1.62814	1.49273	0.00091367
	245	1.35565	1.39565	1.34565	1.37815	1.35815	1.38815	0.73964
	246	0.949864	0.959864	0.939864	1.02481	0.99481	0.96481	0.0986991
	247	2.01475	1.97475	2.03475	2.06259	1.98259	2.08259	0.122472
	248	1.27059	1.28059	1.28059	1.31214	1.23214	1.30214	0.874445
	249	2.20892	2.23892	2.19892	2.29201	2.24201	2.31201	0.180372
	250	0.565174	0.575174	0.585174	0.639165	0.529165	0.619165	0.617426
	251	1.53504	1.49504	1.52504	1.46646	1.48646	1.47646	0.140639
	252	2.44542	2.40542	2.45542	2.53233	2.56233	2.51233	0.0773541
	253	2.15529	2.20529	2.14529	2.18406	2.19406	2.16406	0.419943
	254	1.68711	1.65711	1.66711	1.69729	1.66729	1.71729	0.219855
	255	1.81272	1.78272	1.89272	1.85478	1.87478	1.87478	0.347494
	256	2.4264	2.5164	2.4564	2.41855	2.38855	2.40855	0.224986
	257	2.09169	2.05169	2.11169	1.94166	2.06166	1.97166	0.212965
	258	2.33529	2.31529	2.32529	2.28326	2.30326	2.35326	0.65436
	259	1.07877	1.04877	1.05877	0.95028	1.02028	1.07028	0.364254
	260	1.48162	1.51162	1.50162	1.47404	1.58404	1.49404	0.548429
	261	2.46971	2.51971	2.44971	2.54425	2.57425	2.45425	0.165759
	262	0.92042	0.87042	0.93042	1.02941	0.95941	0.90941	0.28181
	263	0.813525	0.763525	0.823525	0.871902	0.881902	0.811902	0.280461
	264	2.43607	2.38607	2.44607	2.45192	2.33192	2.41192	0.365766
	265	1.87519	1.92519	1.85519	1.96083	1.93083	1.90083	0.186771
	266	1.83366	1.85366	1.82366	1.96461	1.91461	1.84461	0.158012
	267	1.76268	1.71268	1.78268	1.74196	1.72196	1.75196	0.36278
	268	0.702984	0.672984	0.712984	0.730866	0.720866	0.720866	0.137104
	269	1.18198	1.22198	1.16198	1.21004	1.18004	1.29004	0.521048
	270	1.31004	1.36004	1.33004	1.27241	1.30241	1.35241	0.418578
	271	2.01171	1.96171	2.02171	1.98056	2.08056	2.02056	0.593347
9	272	4.76561	4.58372	4.68803	6.61124	6.67182	6.83041	0.00202259
	273	1.02688	1.03688	1.03688	1.01786	1.07786	0.957863	0.696339
	274	1.65201	1.68201	1.64201	1.66574	1.64574	1.68574	0.790577
	275	2.26012	2.25013	2.25013	2.33667	2.26667	2.28667	0.133926
	276	2.49211	2.47211	2.50211	2.50392	2.52392	2.48392	0.532985
	277	1.88448	1.87448	1.90448	1.86275	1.88275	1.84275	0.341909
	278	2.14057	2.13057	2.13057	2.06219	2.13219	2.17219	0.771427
	279	1.51083	1.56083	1.49083	1.6053	1.5153	1.5753	0.428
	280	1.76317	1.78317	1.75317	1.79419	1.76419	1.68419	0.578457
	281	1.87035	1.90035	1.89035	1.8244	1.9444	1.8044	0.525776
	282	1.64876	1.61876	1.65876	1.70326	1.62326	1.65326	0.438001
	283	0.852665	0.842665	0.872665	0.760846	0.820846	0.850846	0.192629
	284	1.16652	1.19652	1.14652	1.05874	1.12874	1.24874	0.74067
	285	2.27094	2.24094	2.28094	2.26847	2.33847	2.19847	0.9431
	286	1.31368	1.32368	1.30368	1.34049	1.25049	1.32049	0.785916
	287	1.03868	1.07868	1.04868	1.09857	0.988567	1.03857	0.785622
	288	1.59078	1.54078	1.60078	1.51659	1.50659	1.48659	0.0847589
	289	0.986977	0.916977	0.906977	0.921653	0.901653	0.931653	0.547978
	290	0.995988	0.985988	0.975988	0.985756	0.995756	0.965756	0.646286
	291	0.620904	0.670904	0.610904	0.678172	0.648172	0.718172	0.338176
